# Supplementary material for: Near-infrared emission of novel bent-core V-shaped conjugated polymers based on the B,O-chelated azadipyrromethene structure
Source: Royal Society of Chemistry journal article supplement (doi:10.1039/c3py00528c), 2013-01-01

## Supporting Information

# Near-Infrared Emission of Novel Bent-core V-shape Conjugated Polymers based on *B, O*-Chelated Azadipyrromethene Structure

Xiao Ma, Xiaoxiang Jiang, Shuwei Zhang, Xiaobo Huang, Yixiang Cheng\*, Chengjian Zhu\*

Key Lab of Mesoscopic Chemistry of MOE, School of Chemistry and Chemical Engineering,  
Nanjing University, Nanjing 210093, China

## Contents:

1.  $^1\text{H}$  NMR and  $^{13}\text{C}$  NMR spectra of the compounds
2. Mass spectra

**<sup>1</sup>H NMR and <sup>13</sup>C NMR spectra of the compounds**

<sup>1</sup>H NMR of **3a** in CDCl<sub>3</sub>

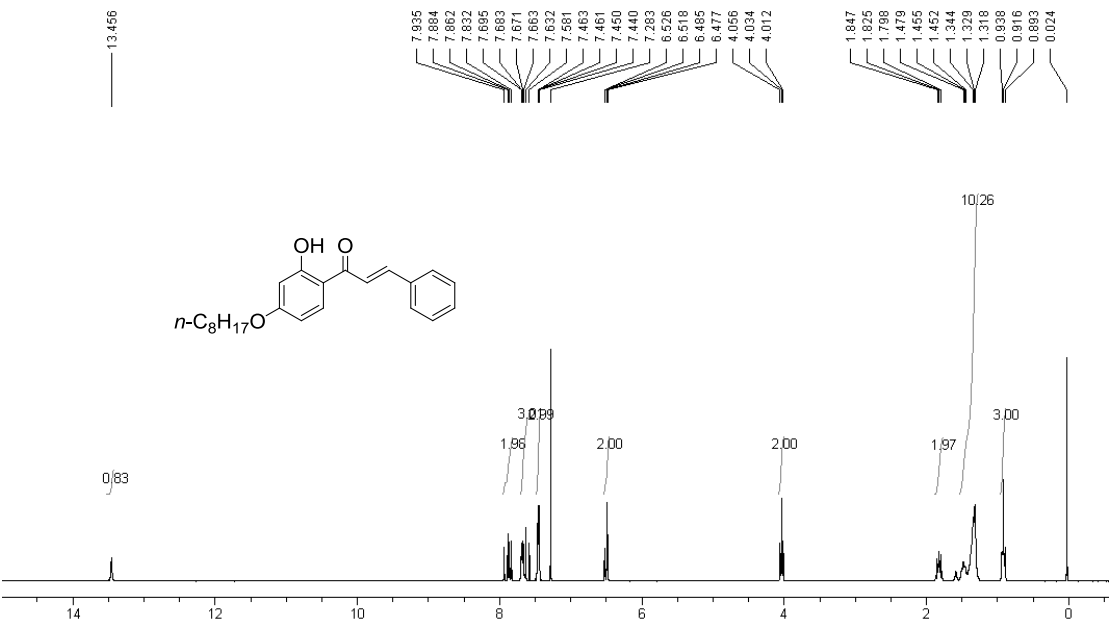

<sup>13</sup>C NMR of **3a** in CDCl<sub>3</sub>

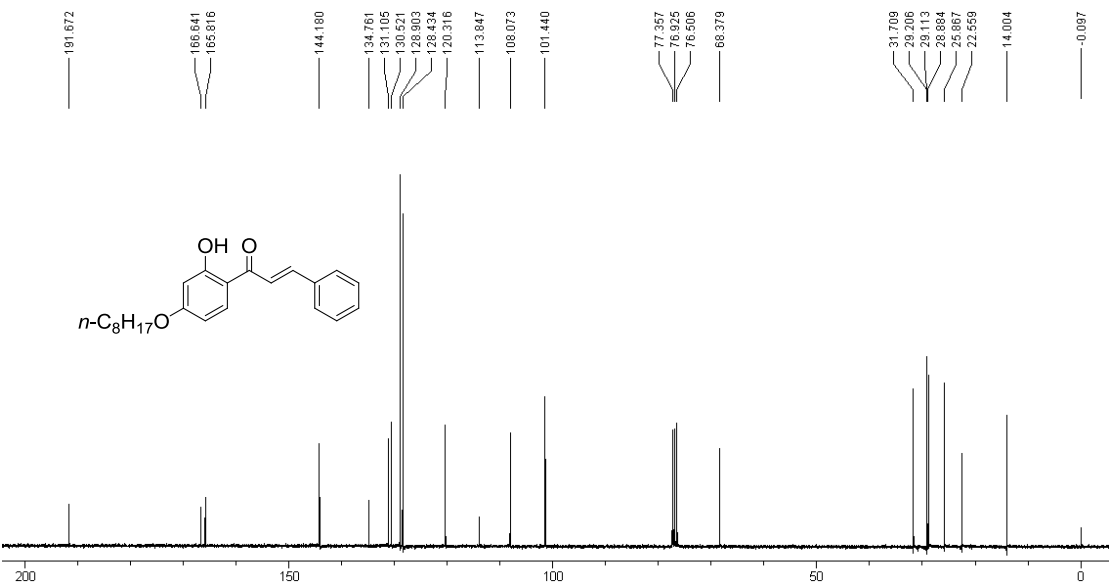

<sup>1</sup>H NMR of **3b** in CDCl<sub>3</sub>

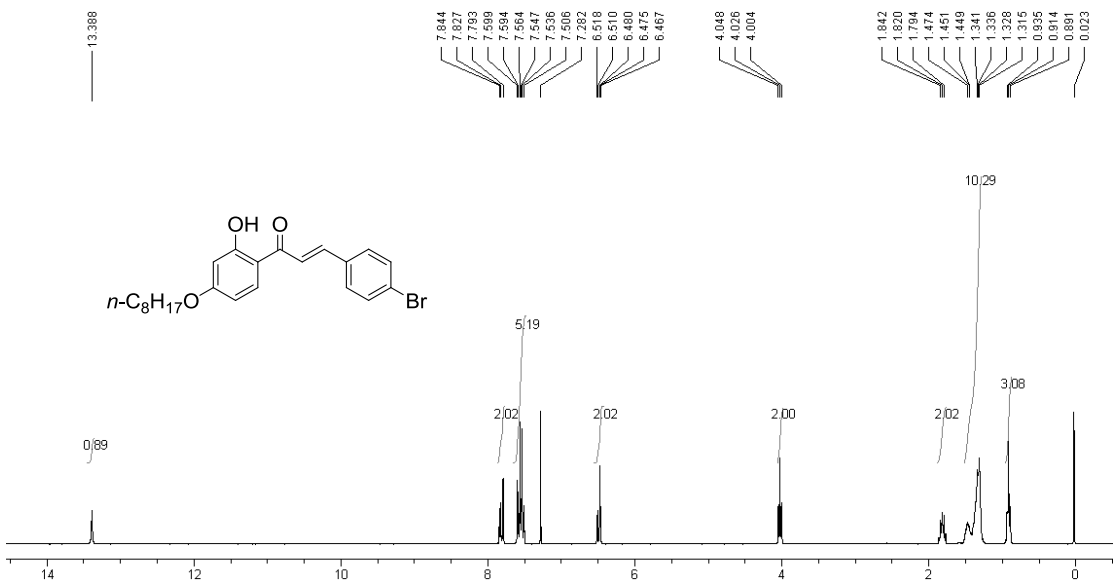

<sup>13</sup>C NMR of **3b** in CDCl<sub>3</sub>

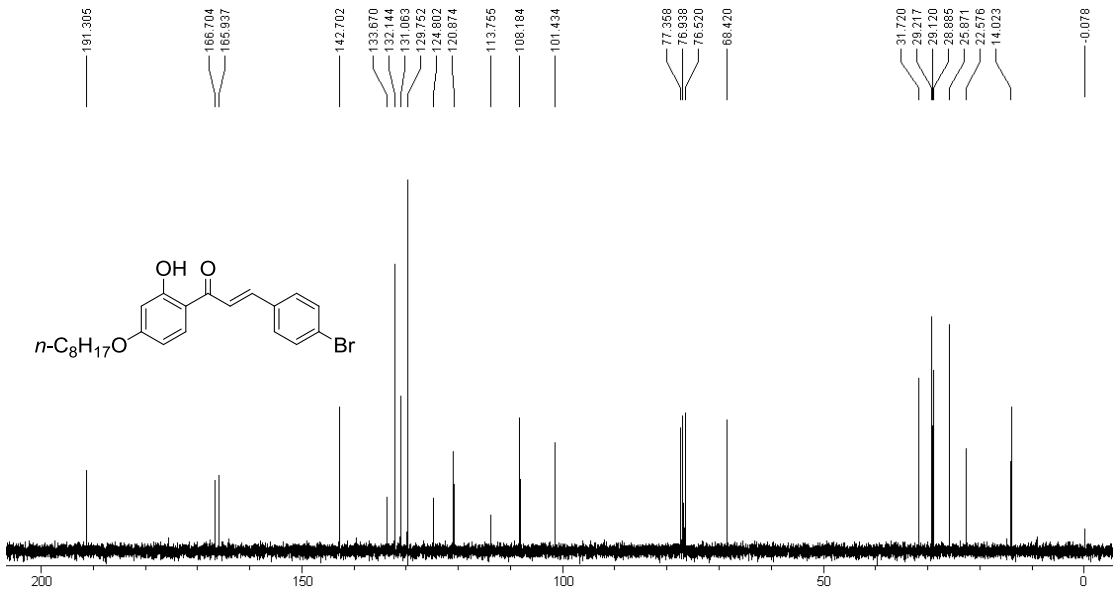

<sup>1</sup>H NMR of **4a** in CDCl<sub>3</sub>

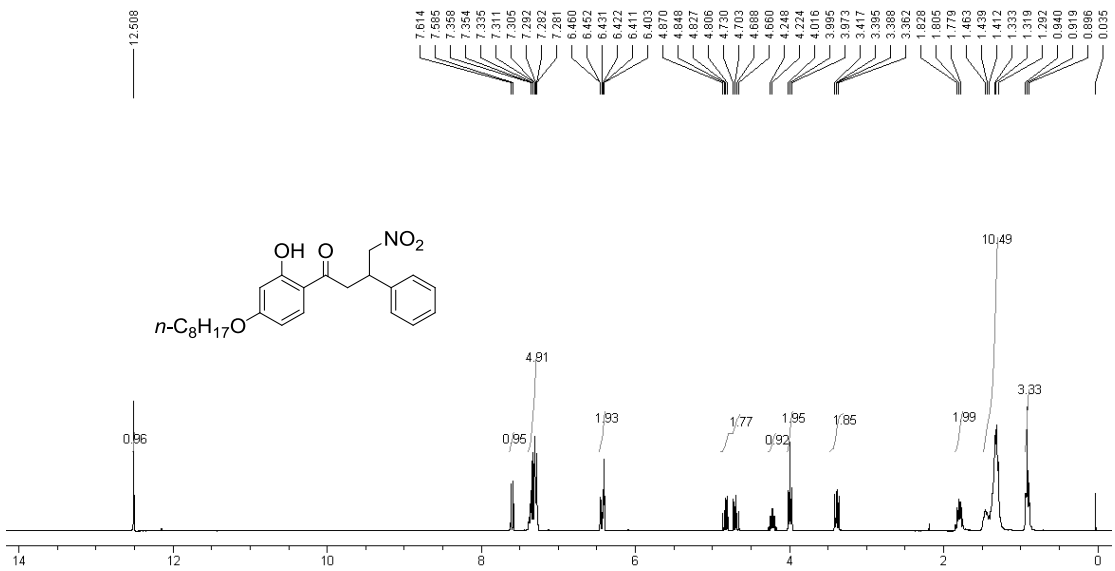

<sup>13</sup>C NMR of **4a** in CDCl<sub>3</sub>

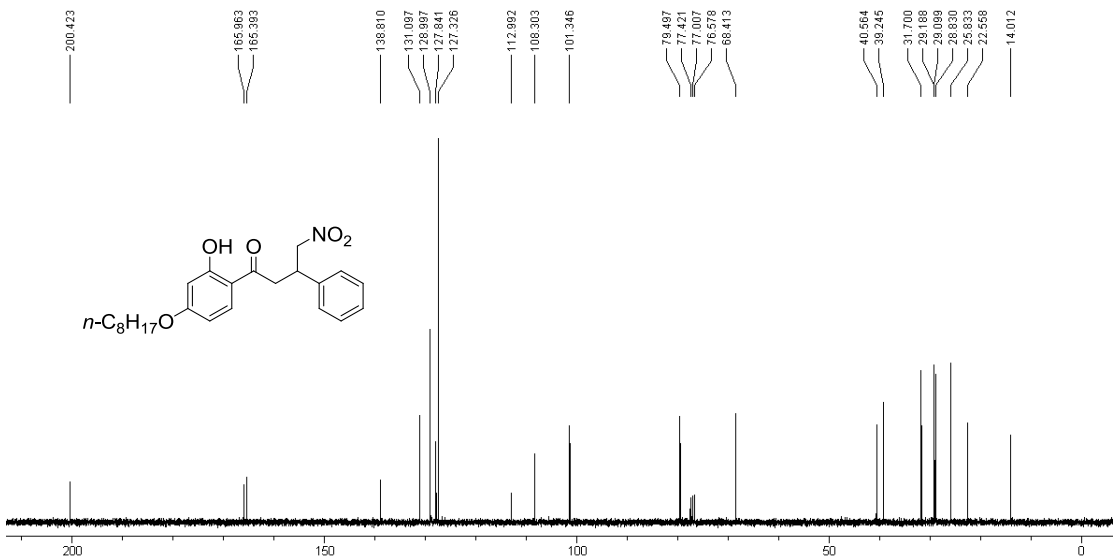

<sup>1</sup>H NMR of **4b** in CDCl<sub>3</sub>

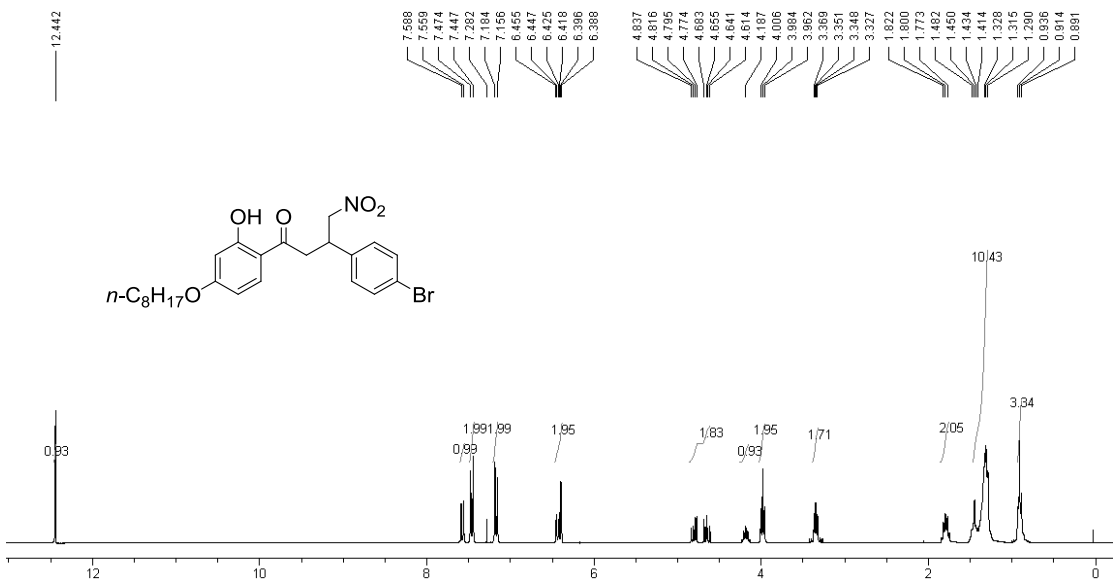

<sup>13</sup>C NMR of **4b** in CDCl<sub>3</sub>

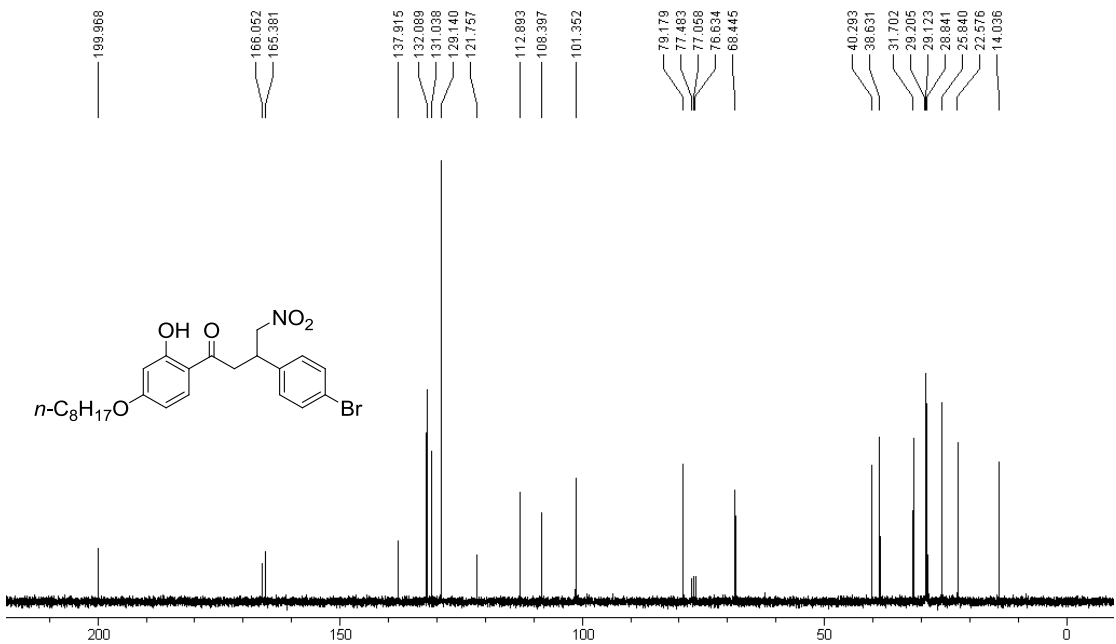

<sup>1</sup>H NMR of **6** in CDCl<sub>3</sub>

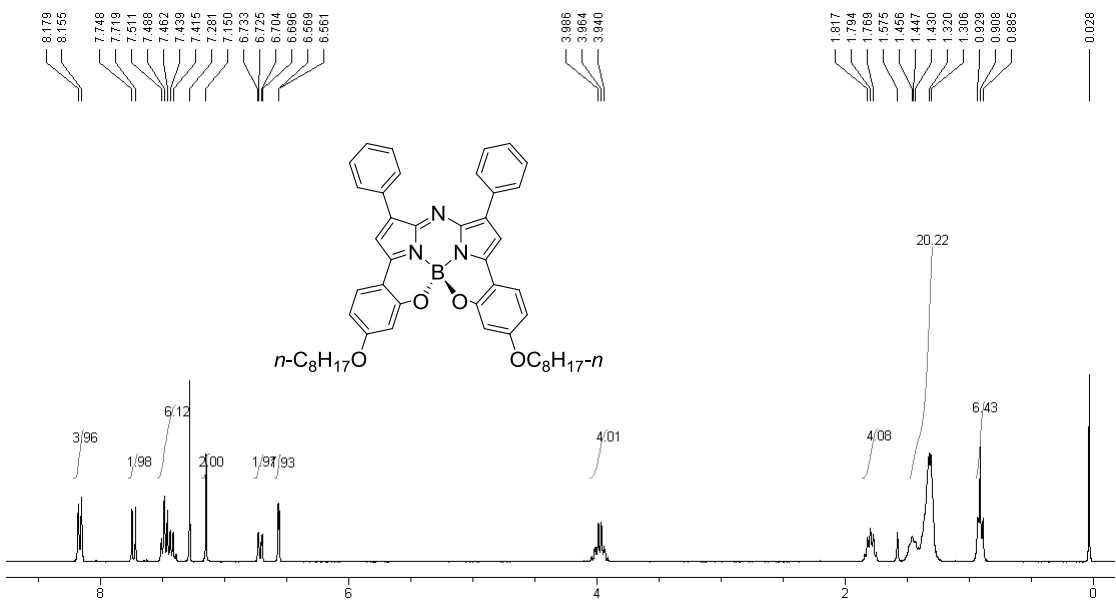

<sup>13</sup>C NMR of **6** in CDCl<sub>3</sub>

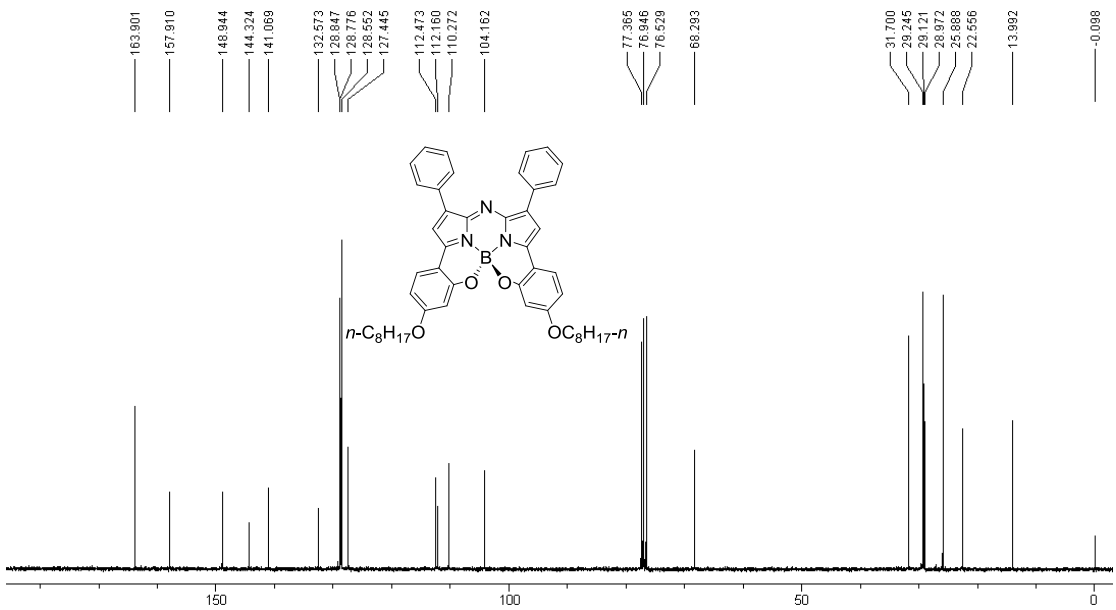

<sup>1</sup>H NMR of **M-1** in CDCl<sub>3</sub>

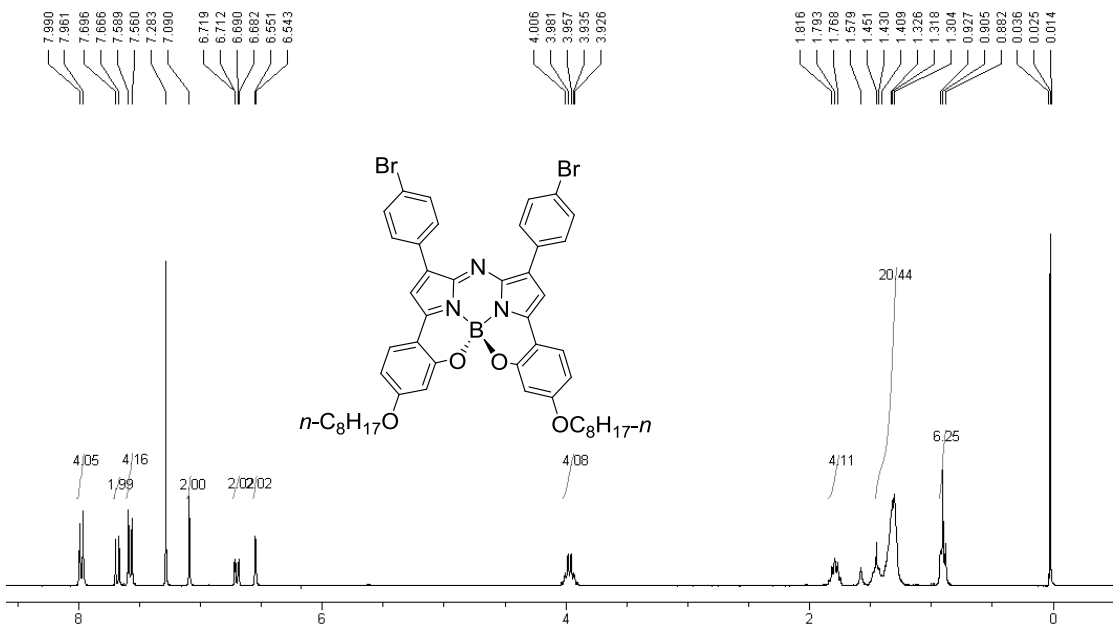

<sup>13</sup>C NMR of **M-1** in CDCl<sub>3</sub>

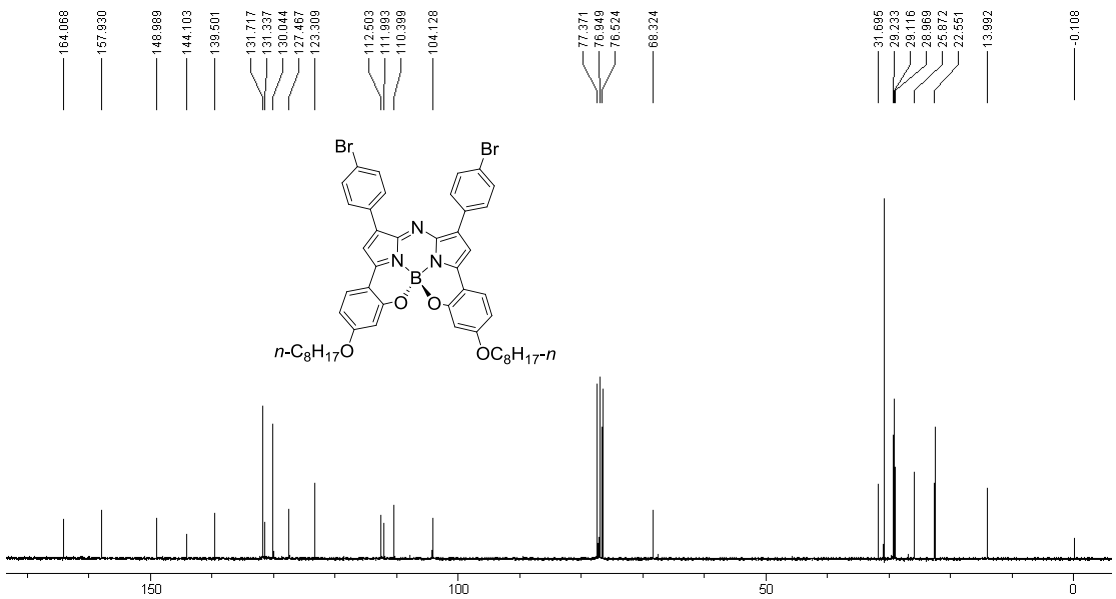

<sup>1</sup>H NMR of **M-2** in CDCl<sub>3</sub>

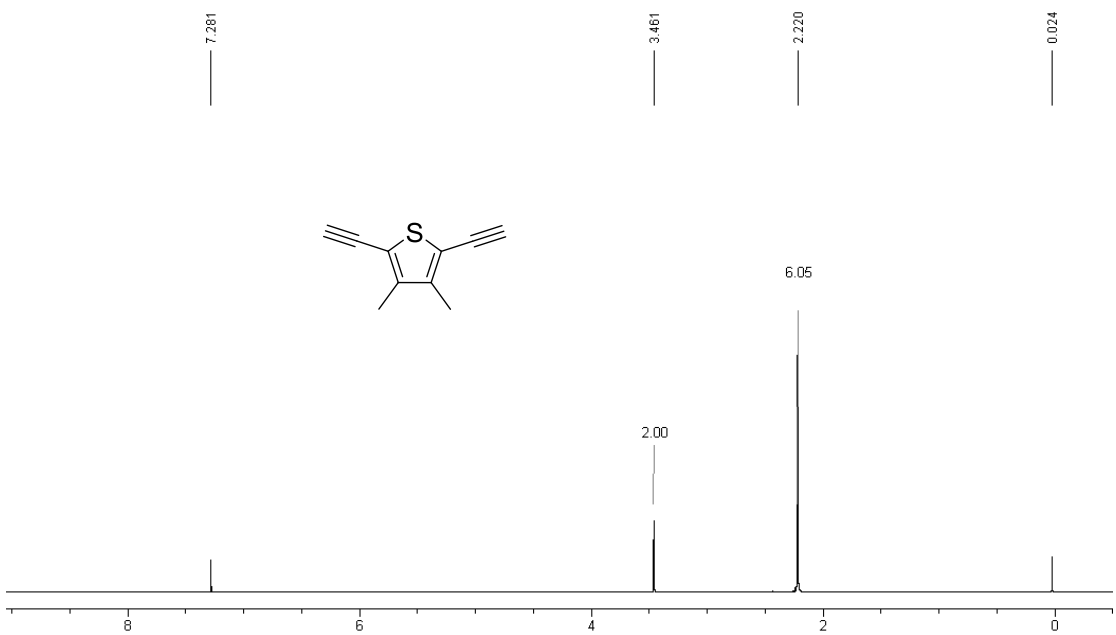

<sup>1</sup>H NMR of **M-3** in CDCl<sub>3</sub>

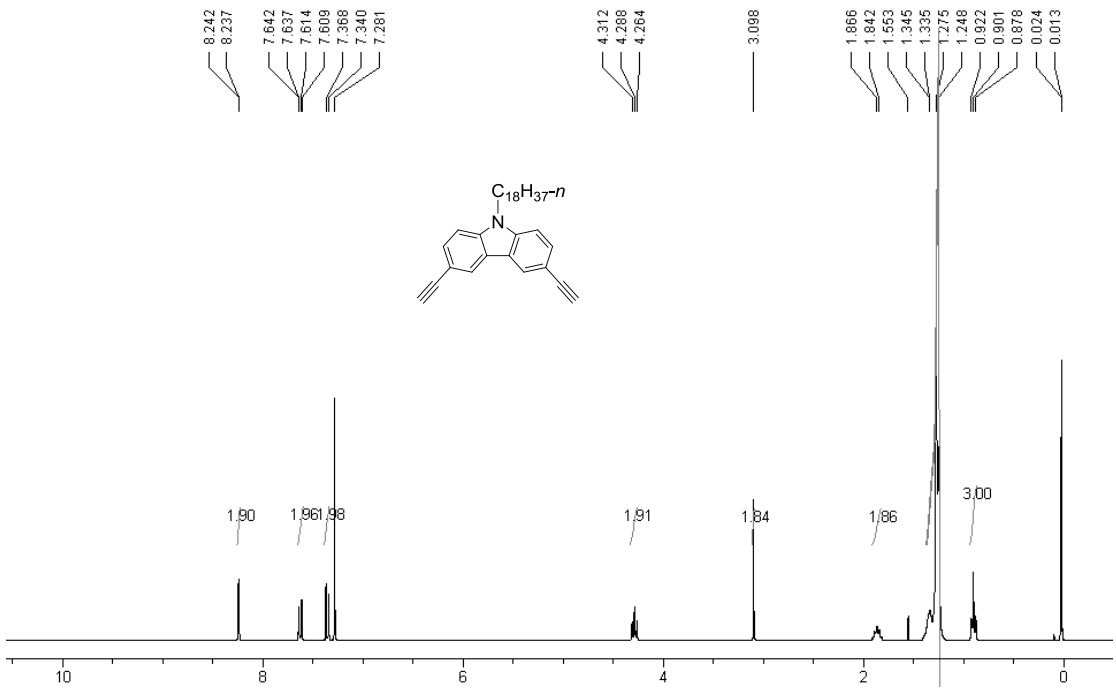



<sup>13</sup>C NMR of **M-3** in CDCl<sub>3</sub>

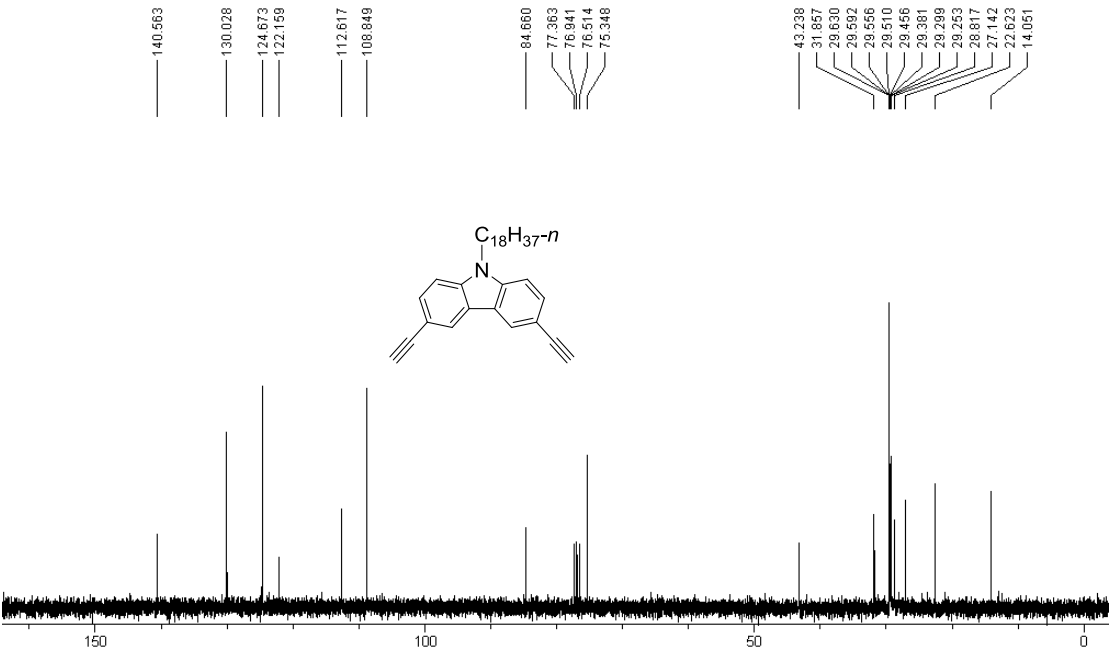

<sup>1</sup>H NMR of **P-1** in CDCl<sub>3</sub>

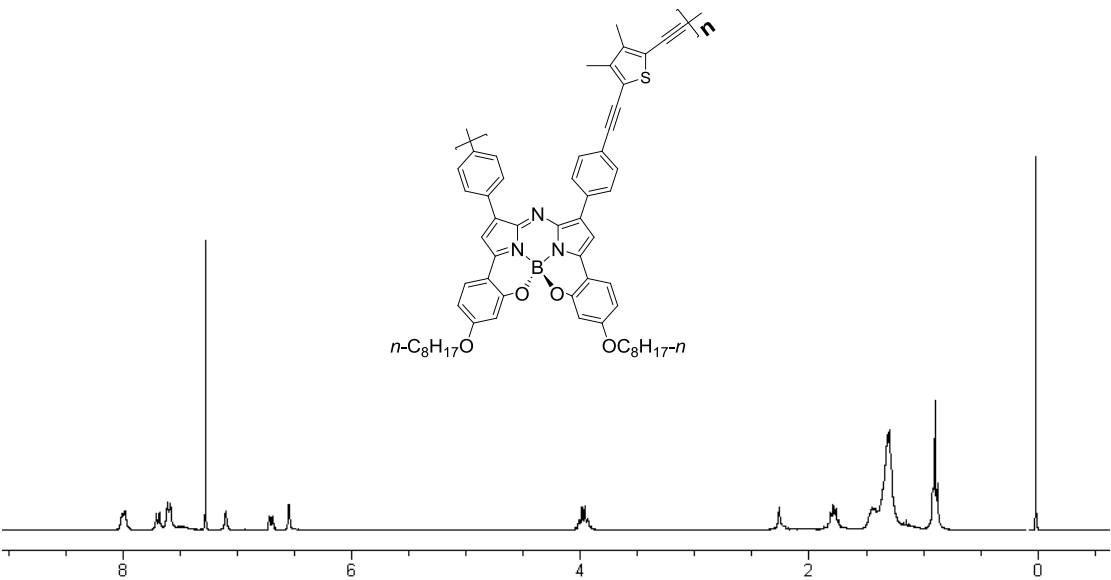

<sup>1</sup>H NMR of **P-2** in CDCl<sub>3</sub>

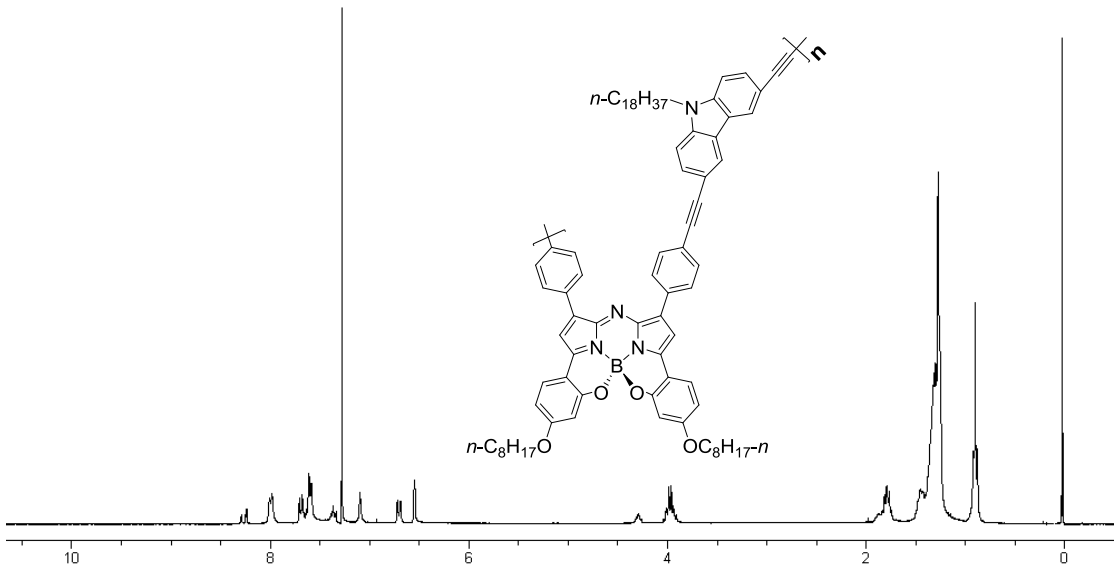

<sup>1</sup>H NMR of **P-3** in CDCl<sub>3</sub>

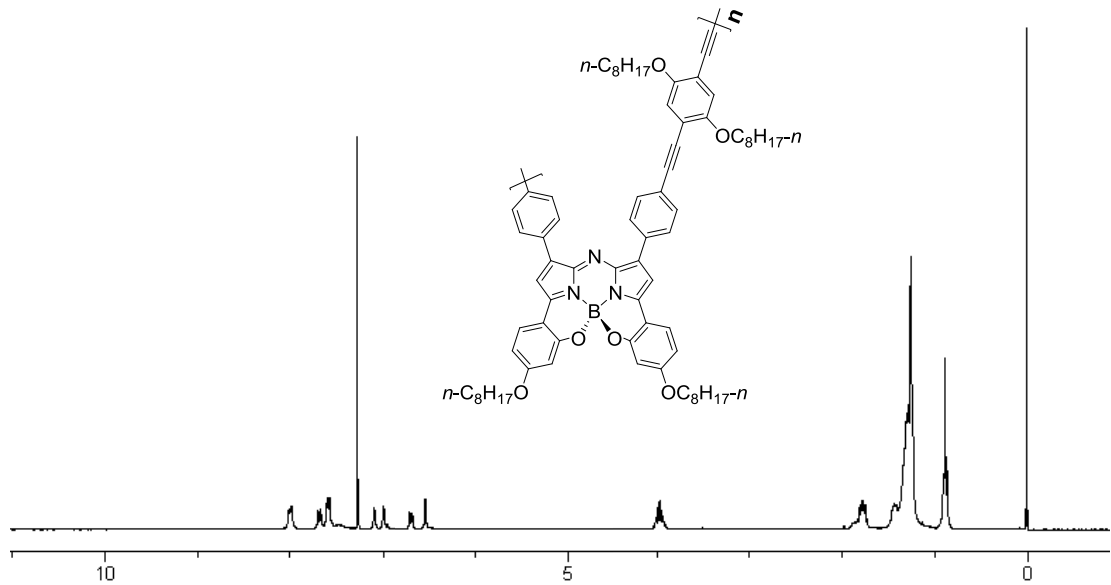

Mass spectrum

Compound 3a

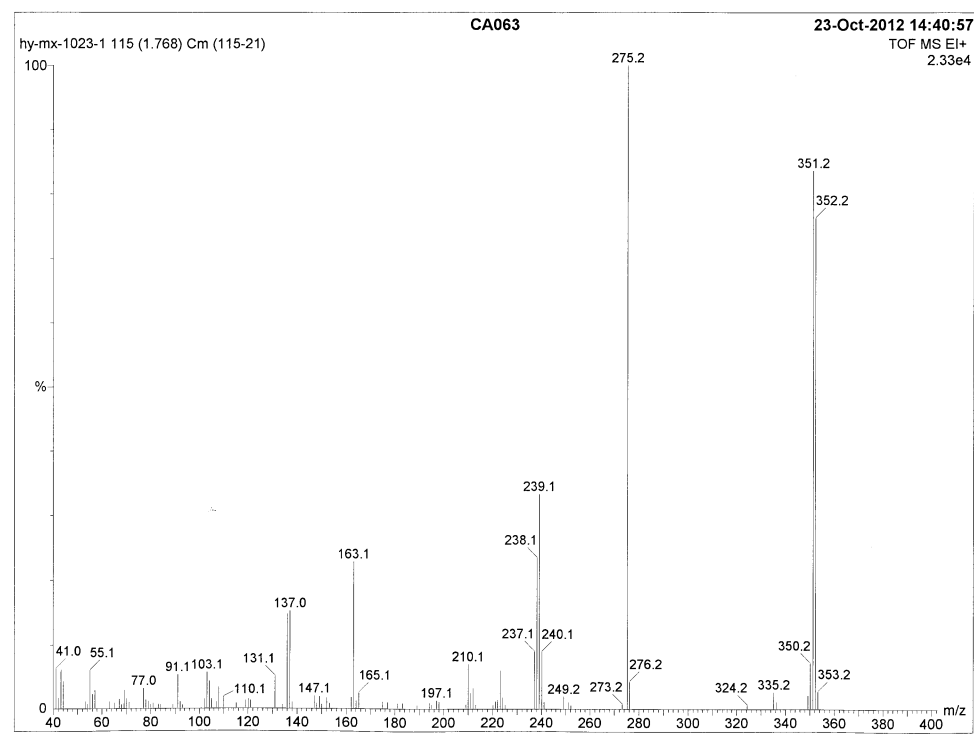

Compound 3b

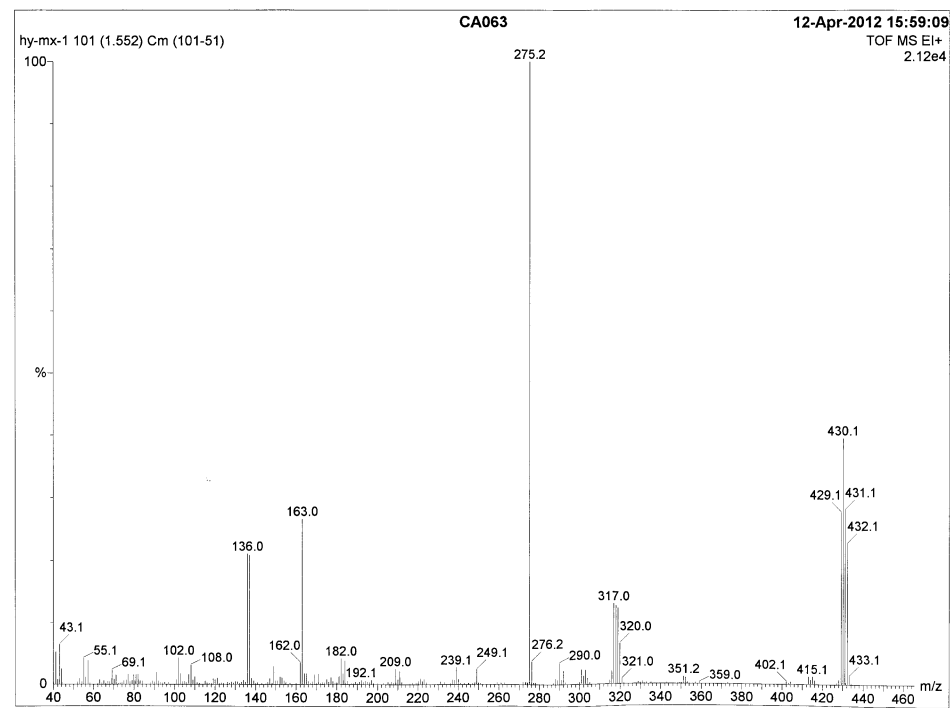

Compound **4a**

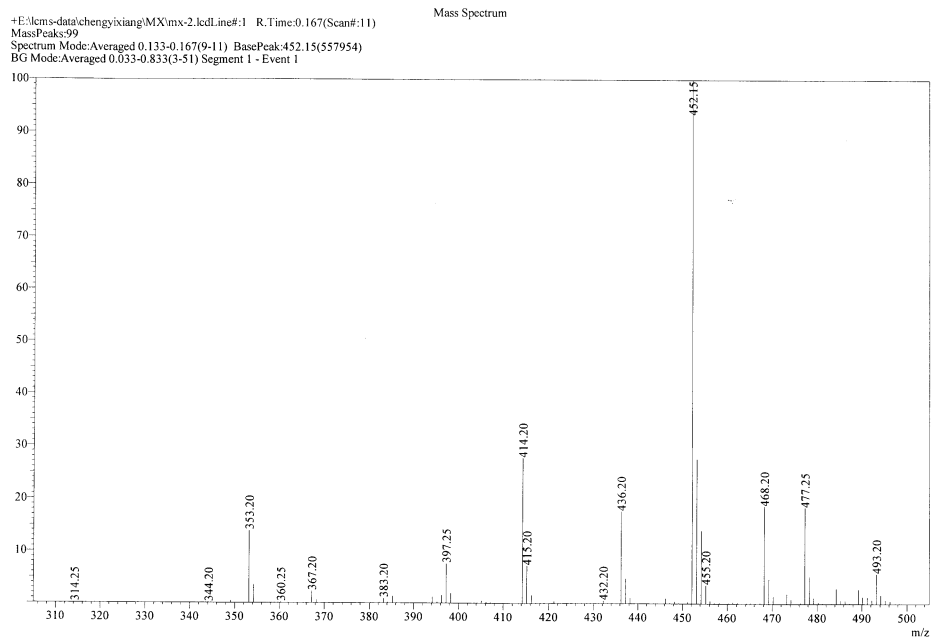

Compound **4b**

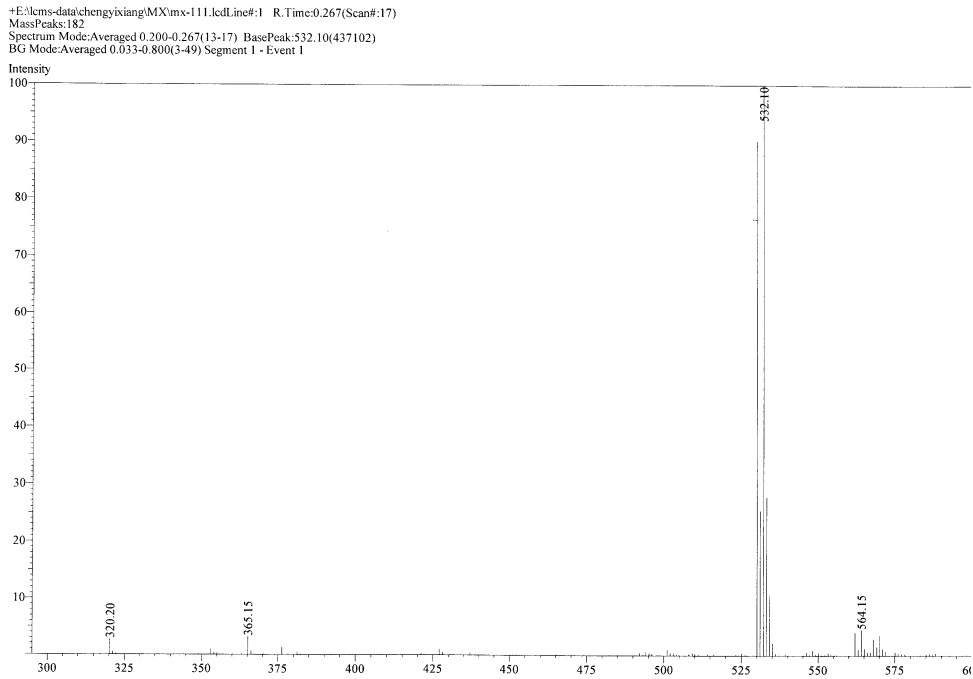

Compound **6**

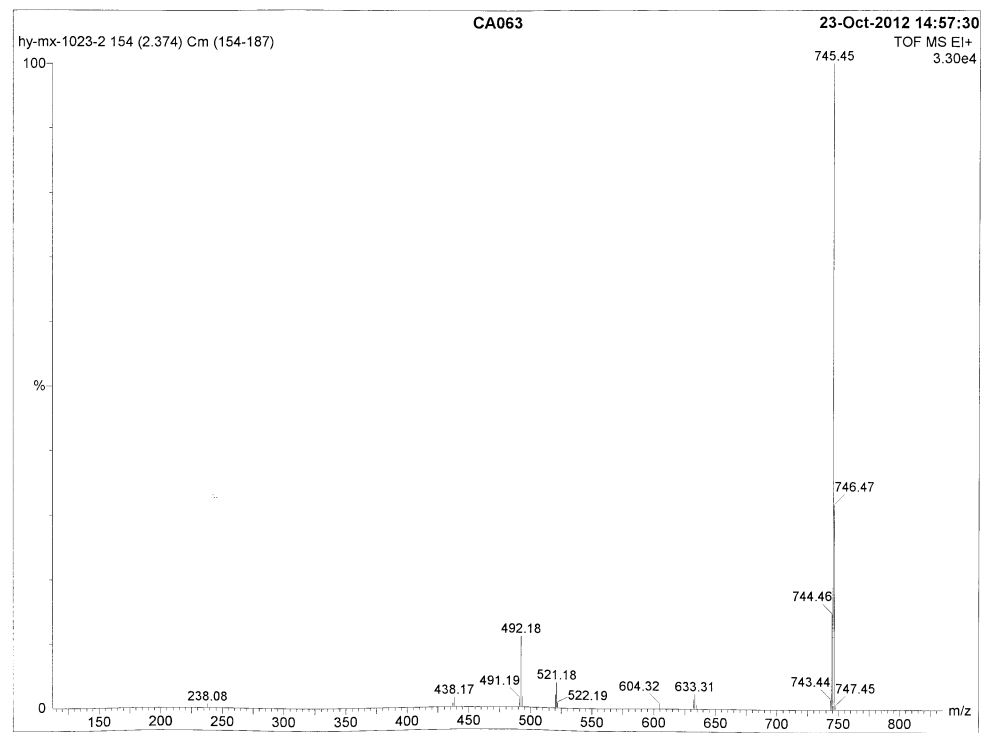

Compound **M-1**

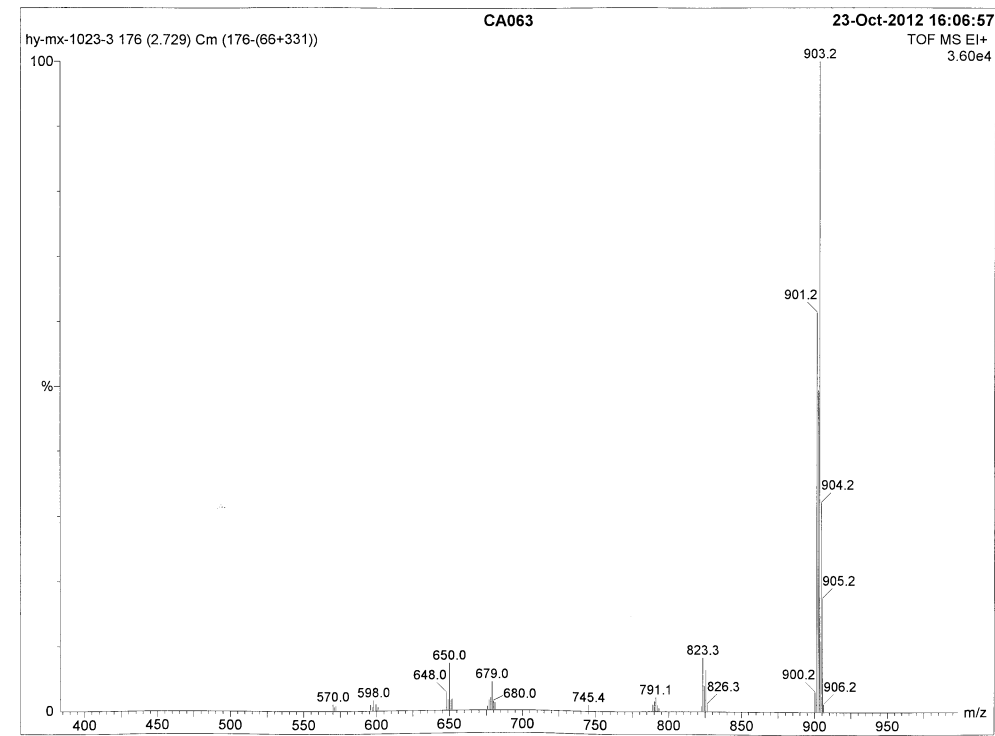

Compound 8

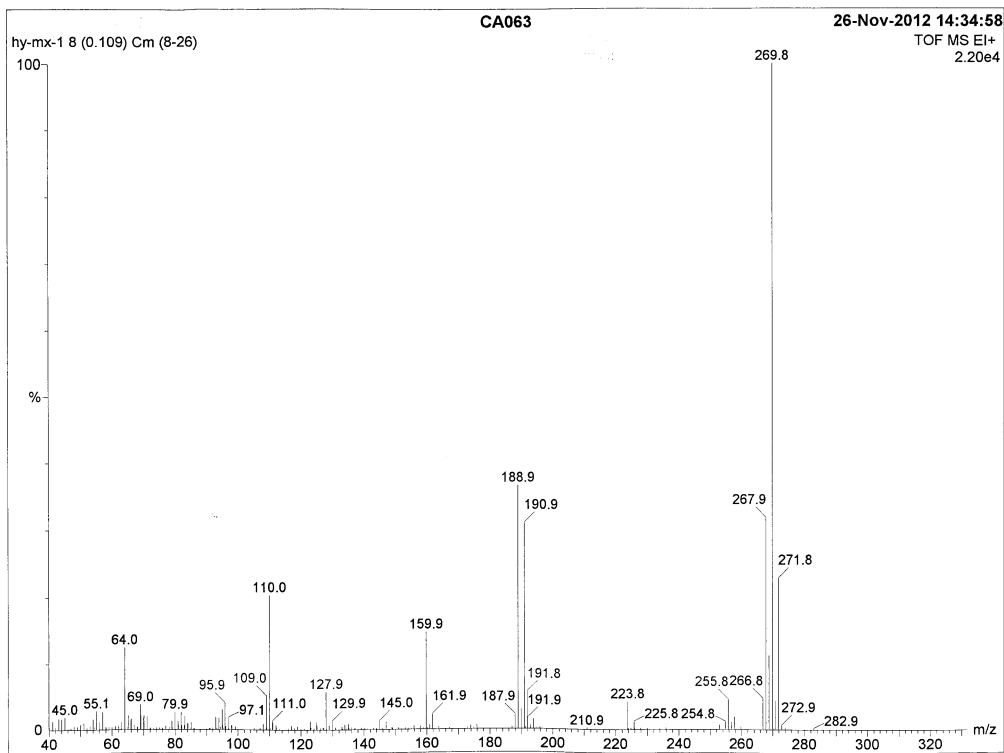

Compound M-2

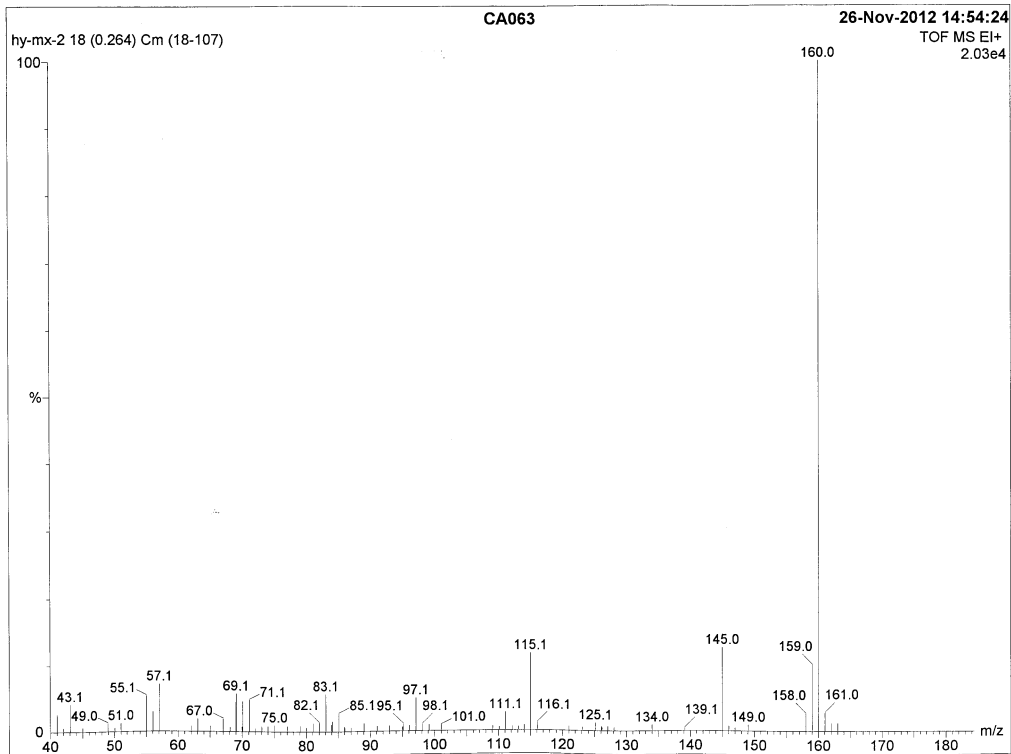

Compound **M-3**

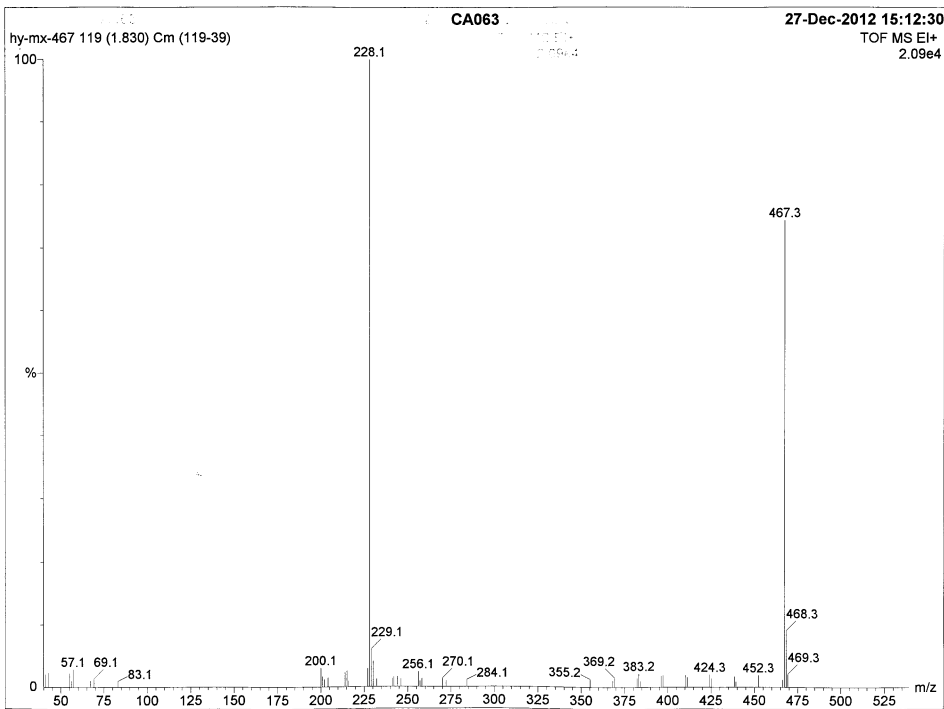

Supplement: c3py00528c.pdf [file c3py00528c.pdf]
